# Supplementary material for: Neuroprotective Effects of PARP Inhibitors in Drosophila Models of Alzheimer’s Disease
Source: Cells. 2022 Apr 9;11(8):1284. doi: 10.3390/cells11081284 (PMC9027574; doi:10.3390/cells11081284)
Supplement: Supplementary file 1 [file cells-11-01284-s001.zip › cells-1589947-supplementary.pdf]

## Supplementary Information

### Neuroprotective effects of PARP inhibitors in *Drosophila* models of Alzheimer's disease

Anna Maggiore, Assunta Maria Casale, Walter Toscanelli, Ugo Cappucci, Dante Rotili, Maddalena Grieco, Jean-Philippe Gagné, Guy G. Poirier, Maria d'Erme, Lucia Piacentini

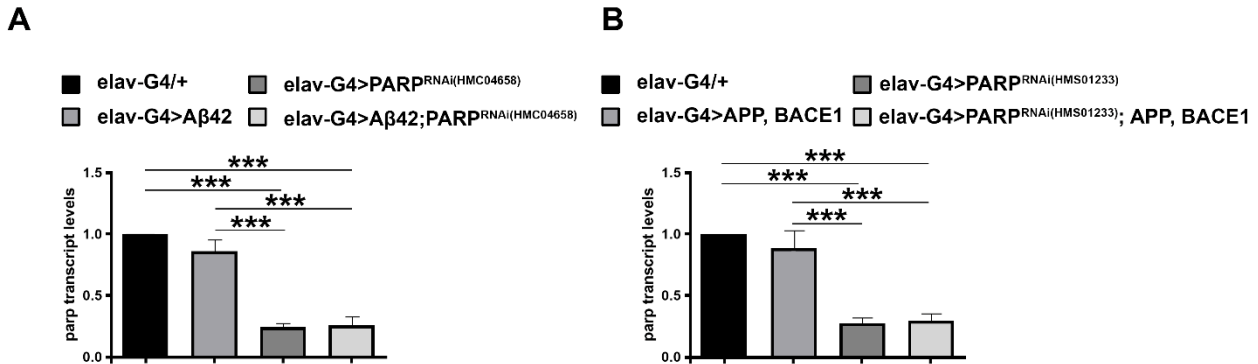

Supplementary Figure S1. Quantitative analysis of transcript levels of PARP-1 in Aβ42 and APP/BACE1 fly models. qRT-PCR analysis assessing PARP-1 mRNA levels in head tissues isolated from both Aβ42 (A) and APP/BACE1 (B) AD models following *in vivo* PARP-1 RNAi. The constitutive *rp49* was examined as an endogenous control. The data are expressed as “fold enrichment” with respect to *elav-Gal4/+* and represent the mean ± SEM of three independent experiments. Statistical significance was determined using the one-way ANOVA test followed by the Tukey test for multiple comparisons (\*\*p<0.01, \*\*\*p<0.001).

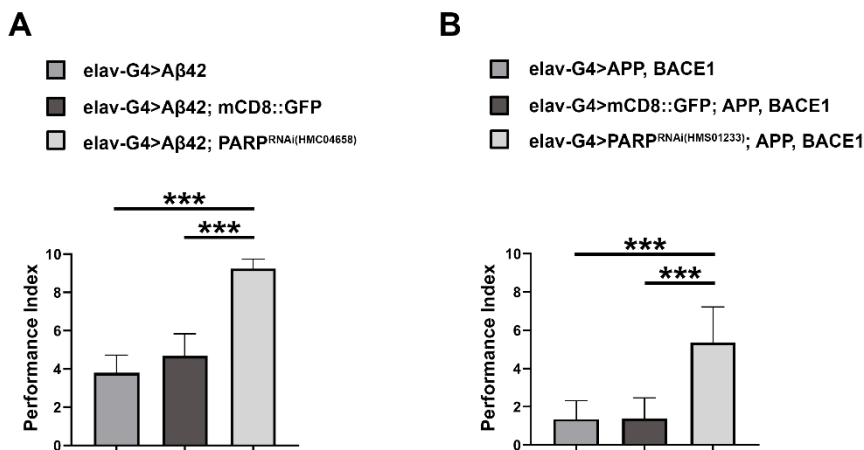

Supplementary Figure S2. Quantitative analysis of climbing defects in AD fly models. (A) Climbing test on *elav-Gal4>Aβ42*, *elav-Gal4>mCD8::GFP;Aβ42*, and *elav-Gal4>Aβ42;PARP-1<sup>RNAi</sup>(HMC04658)* flies. (B) Climbing test on *elav-Gal4>APP, BACE1*, *elav-Gal4>mCD8::GFP;APP, BACE1*, and *elav-Gal4>PARP-1<sup>RNAi</sup>(HMS01233);APP, BACE1* flies. Statistical significance was determined using the one-way ANOVA test followed by the Tukey test for multiple comparisons (\*\*p<0.01, \*\*\*p<0.001).
